# Supplementary material for: Crocodylus porosus Gut Bacteria: A Possible Source of Novel Metabolites
Source: MDPI journal article supplement (doi:10.3390/molecules26164999), 2021-08-18
Supplement: s1 [file s1]

**Table S1: MTT assay revealed that CM from selected gut bacteria of *C. porosus* did not affect HeLa cell viability.**

| <i>Crocodylus porosus</i><br>organ | Bacteria                                                  | % cell viability inhibition using MTT assay |
|------------------------------------|-----------------------------------------------------------|---------------------------------------------|
|                                    |                                                           | HeLa                                        |
| Mouth & Oesophagus                 | <i>Atlantibacter hermannii</i>                            | 4.5                                         |
|                                    | <i>Bacillus aryabhattai</i>                               | 3                                           |
|                                    | <i>Brevibacterium sediminis</i>                           | 6.4                                         |
|                                    | <i>Chryseobacterium yeoncheonense</i>                     | 2.2                                         |
|                                    | <i>Deinococcus grandis</i>                                | 4.7                                         |
|                                    | <i>Diaphorobacter polyhydroxybutyrativorans</i>           | 1.7                                         |
|                                    | <i>Edwardsiella tarda</i>                                 | 7.8                                         |
|                                    | <i>Enterobacter cloacae</i>                               | 9                                           |
|                                    | <i>Microbacterium paraoxydans</i>                         | 7.6                                         |
|                                    | <i>Ochrobactrum intermedium</i>                           | 4                                           |
|                                    | <i>Staphylococcus aureus</i>                              | 9.8                                         |
|                                    | <i>Staphylococcus pasteurii</i>                           | 7.8                                         |
|                                    | <i>Tsukamurella spumae</i>                                | 5.4                                         |
| Stomach                            | <i>Aeromonas salmonicida</i>                              | 8.6                                         |
| Small intestine                    | <i>Enterobacter cloacae</i>                               | 7                                           |
|                                    | <i>Enterobacter tabaci</i>                                | 8.2                                         |
|                                    | <i>Klebsiella pneumoniae subsp. Rhinoscleromatis</i>      | 7.6                                         |
|                                    | <i>Klebsiella quasipneumoniae subsp. Similipneumoniae</i> | 9.2                                         |
|                                    | <i>Ochrobactrum oryzae</i>                                | 3.2                                         |
|                                    | <i>Providencia alcalifaciens</i>                          | 5                                           |
|                                    | <i>Pseudomonas gueszennei</i>                             | 9.5                                         |
|                                    | <i>Staphylococcus pasteurii</i>                           | 8.3                                         |
| Large intestine                    | <i>Plesiomonas shigelloides</i>                           | 4                                           |
|                                    | <i>Proteus hauseri</i>                                    | 3.3                                         |
|                                    | <i>Proteus mirabilis</i>                                  | 5.4                                         |
|                                    | <i>Proteus vulgaris</i>                                   | 2                                           |
|                                    | <i>Providencia alcalifaciens</i>                          | 4.4                                         |
| Anus                               | <i>Aeromonas dhakensis</i>                                | 9.8                                         |
|                                    | <i>Proteus mirabilis</i>                                  | 6.4                                         |
|                                    | <i>Proteus terrae</i>                                     | 5.5                                         |

**Table S2A: Molecules that were identified from the conditioned media prepared from *P. guezenei* isolated from the duodenum of *C. porosus* through LC-MS.** The conditioned media prepared from *P. guezenei* was subjected to chloroform extraction and the extracts were subject to LC-MS analysis. The spectre generated were searched in the METLIN library in order to reveal the potential identity of the detected molecules.

|   | <b>Compound</b>                                                                                                                                                                                 | <b>Mass</b> | <b><i>m/z</i></b> |
|---|-------------------------------------------------------------------------------------------------------------------------------------------------------------------------------------------------|-------------|-------------------|
| 1 | <b>L-Galactose</b><br>Molecular formula: C <sub>6</sub> H <sub>12</sub> O <sub>6</sub><br>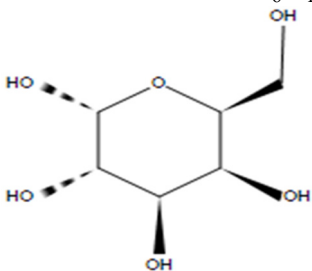                     | 180.06      | 215.03            |
| 2 | <b>Threonylglycine</b><br>Molecular formula: C <sub>6</sub> H <sub>12</sub> N <sub>2</sub> O <sub>4</sub><br> | 176.08      | 175.07            |
| 4 | <b>Lactic acid</b><br>Molecular formula: C <sub>3</sub> H <sub>6</sub> O <sub>3</sub><br>                    | 90.03       | 125.00            |
| 5 | <b>F-Honaucin A</b><br>Molecular formula: C <sub>8</sub> H <sub>9</sub> FO <sub>4</sub><br>                  | 188.05      | 187.05            |
| 6 | <b>D-α-Hydroxyglutaric acid</b><br>Molecular formula: C <sub>5</sub> H <sub>8</sub> O <sub>5</sub>                                                                                              | 148.04      | 147.03            |

|    |                                                                                                                                                                       |        |        |
|----|-----------------------------------------------------------------------------------------------------------------------------------------------------------------------|--------|--------|
|    | 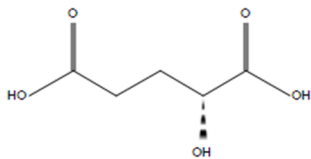                                                                                     |        |        |
| 7  | <b>N-Acryloylglycine</b><br>Molecular formula:<br>$C_5H_7NO_3$<br>                   | 129.04 | 128.04 |
| 8  | <b>Xanthine</b><br>Molecular formula:<br>$C_5H_4N_4O_2$<br>                         | 152.03 | 151.03 |
| 9  | <b>(R)-2,3-Dihydroxy-<br/>isovalerate</b><br>Molecular formula: $C_5H_{10}O_4$<br> | 134.06 | 133.05 |
| 10 | <b>Aminocaproic acid</b><br>Molecular formula:<br>$C_6H_{13}NO_2$<br>              | 131.09 | 130.09 |
| 11 | <b>Ethyl 3-hydroxybutyrate</b><br>Molecular formula: $C_6H_{12}O_3$<br>            | 132.08 | 131.07 |

|    |                                                                                                                                                               |        |        |
|----|---------------------------------------------------------------------------------------------------------------------------------------------------------------|--------|--------|
|    |                                                                                                                                                               |        |        |
| 12 | <b>3-Indoleacetic Acid</b><br>Molecular formula:<br>$C_{10}H_9NO_2$ 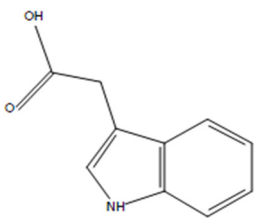         | 175.06 | 174.06 |
| 13 | <b>2-Caffeoylisocitrate</b><br>Molecular formula:<br>$C_{15}H_{14}O_{10}$    | 354.06 | 353.05 |
| 14 | <b>3-hydroxy-decanoic acid</b><br>Molecular formula:<br>$C_{10}H_{20}O_3$  | 188.14 | 187.13 |
| 15 | <b>2-chloropalmitaldehyde</b><br>Molecular formula:<br>$C_{16}H_{31}ClO$   | 274.21 | 309.18 |
| 16 | <b>Betazole</b><br>Molecular formula: $C_5H_9N_3$                          | 111.08 | 112.09 |
| 17 | <b>Fomepizole</b><br>Molecular formula: $C_4H_6N_2$                        | 82.05  | 105.04 |

|    |                                                                                                                                                                    |        |        |
|----|--------------------------------------------------------------------------------------------------------------------------------------------------------------------|--------|--------|
| 18 | <b>2,4-Diamino-6-hydroxylaminotoluene</b><br>Molecular formula: $C_5H_5N_3$ 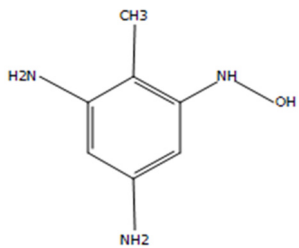      | 153.09 | 154.10 |
| 19 | <b>Norepinephrine (noradrenaline)</b><br>Molecular formula: $C_8H_{11}NO_3$       | 169.07 | 170.08 |
| 20 | <b>Asparagusic acid</b><br>Molecular formula: $C_4H_6O_2S_2$                    | 149.98 | 168.01 |
| 21 | <b>N-(1-Deoxy-1-fructosyl)leucine</b><br>Molecular formula: $C_{12}H_{23}NO_7$  | 293.15 | 294.15 |
| 22 | <b>3-Nitrosothiazolidine</b><br>Molecular formula: $C_3H_6N_2OS$                                                                                                   | 118.02 | 119.03 |

|    |                                                                                                                                                                                                                   |        |        |
|----|-------------------------------------------------------------------------------------------------------------------------------------------------------------------------------------------------------------------|--------|--------|
|    | 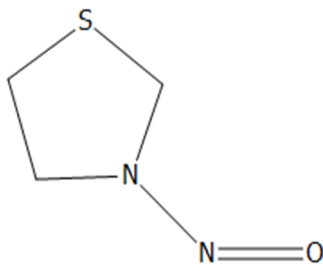                                                                                                                                 |        |        |
| 24 | <p><b>L-<math>\alpha</math>-Amino-1H-pyrrole-1-hexanoic acid</b><br/>Molecular formula:<br/><math>C_{10}H_{16}N_2O_2</math></p>  | 196.12 | 197.13 |
| 25 | <p><b>Homocysteine thiolactone</b><br/>Molecular formula:<br/><math>C_4H_7NOS</math></p>                                       | 117.03 | 118.03 |
| 26 | <p><b>L,L-Cyclo(leucylprolyl)</b><br/>Molecular formula:<br/><math>C_{11}H_{18}N_2O_2</math></p>                               | 210.14 | 211.14 |
| 27 | <p><b>Pseudomonine</b><br/>Molecular formula:<br/><math>C_{16}H_{18}N_4O_4</math></p>                                                                                                                             | 330.13 | 331.14 |

|    |                                                                                                                                                                        |        |        |
|----|------------------------------------------------------------------------------------------------------------------------------------------------------------------------|--------|--------|
|    | 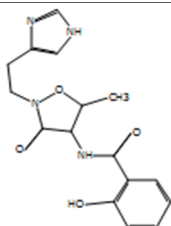                                                                                      |        |        |
| 28 | <b>Kynuramine</b><br>Molecular formula:<br>$C_9H_{12}N_2O$                            | 164.09 | 165.1  |
| 29 | <b>12-oxo-10Z-octadecenoic acid</b><br>Molecular formula:<br>$C_{18}H_{32}O_3$      | 296.24 | 297.24 |
| 30 | <b>9Z,12Z,15E-octadecatrienoic acid</b><br>Molecular formula:<br>$C_{18}H_{30}O_2$  | 278.22 | 279.23 |
| 31 | <b>Arachidoyl glycine</b><br>Molecular formula:<br>$C_{22}H_{43}NO_3$               | 369.32 | 370.33 |

**Table S2B: Molecules that remained unidentified from the conditioned media prepared from *P. guezannei* isolated from the duodenum of *C. porosus* through LC-MS.** The conditioned media prepared from *P. guezannei* was subjected to chloroform extraction and the extracts were subject to LC-MS analysis. The spectre generated were searched in the METLIN library in order to reveal the potential identity of the detected molecules.

| Compound | Retention time | Molecular mass | Molecular formula  |
|----------|----------------|----------------|--------------------|
| 1        | 0.649          | 271.8422       | $C_6 H_2 Cl_2 S_4$ |

|    |        |          |                   |
|----|--------|----------|-------------------|
| 2  | 0.654  | 213.8924 | C4 H Cl3 N2 S     |
| 3  | 0.655  | 215.8914 | C7 H Cl S3        |
| 4  | 0.794  | 147.9772 | C3 H4 N2 O S2     |
| 5  | 0.866  | 202.0463 | C4 H6 N6 O4       |
| 6  | 1.093  | 118.0291 | C5 H2 N4          |
| 7  | 13.579 | 314.2474 | C19 H30 N4        |
| 8  | 15.337 | 298.1614 | C16 H26 O3 S      |
| 9  | 15.498 | 272.2366 | C16 H32 O3        |
| 10 | 15.634 | 298.1616 | C16 H26 O3 S      |
| 11 | 16.328 | 312.1779 | C17 H28 O3 S      |
| 12 | 16.73  | 312.1777 | C17 H28 O3 S      |
| 13 | 17.016 | 354.2096 | C17 H30 N4 O2 S   |
| 14 | 17.345 | 326.1935 | C14 H30 O8        |
| 15 | 17.564 | 294.1885 | C15 H26 N4 S      |
| 16 | 0.657  | 119.9588 |                   |
| 17 | 1.002  | 175.0813 | C3 H9 N7 O2       |
| 18 | 1.038  | 131.0844 |                   |
| 19 | 1.048  | 137.0719 | C5 H7 N5          |
| 20 | 1.169  | 105.9904 | C3 H6 S2          |
| 21 | 1.698  | 102.0687 | C5 H10 O2         |
| 22 | 8.975  | 195.0864 | C6 H9 N7 O        |
| 23 | 9.918  | 197      | C5 H11 N O S3     |
| 24 | 9.926  | 229.0873 | C11 H16 Cl N O2   |
| 25 | 12.336 | 157.1466 | C9 H19 N O        |
| 26 | 16.678 | 148.0159 | C8 H4 O3          |
| 27 | 20.525 | 627.1859 | C37 H30 Cl N5 O S |
| 28 | 21.343 | 701.2069 | C38 H43 N3 S5     |
| 29 | 23.941 | 662.4465 | C44 H58 N2 O3     |

**Table S3A: Molecules that were identified from the conditioned media prepared from *P. aeruginosa* isolated from the small intestine of *C. porosus* through LC-MS.** The conditioned media prepared from *P. aeruginosa* was subjected to chloroform extraction and the extracts were subject to LC-MS analysis. The spectre generated were searched in the METLIN library in order to reveal the potential identity of the detected molecules.

|   | Compound                                                                                                                                                                         | Mass   | <i>m/z</i> |
|---|----------------------------------------------------------------------------------------------------------------------------------------------------------------------------------|--------|------------|
| 1 | <b>Pitrazepin</b><br>Molecular formula:<br>C <sub>19</sub> H <sub>19</sub> N <sub>5</sub><br>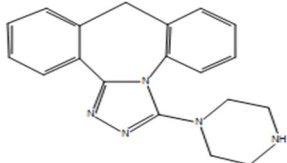 | 317.16 | 316.16     |
| 2 | <b>3beta-Acetoxy-4-oplopanone</b>                                                                                                                                                | 296.20 | 331.17     |



|   |                                                                                                                                                                                                       |        |        |
|---|-------------------------------------------------------------------------------------------------------------------------------------------------------------------------------------------------------|--------|--------|
|   | <p>Molecular formula:<br/>C<sub>17</sub>H<sub>28</sub>O<sub>4</sub></p> 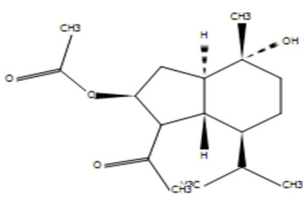                                             |        |        |
| 3 | <p><b>C11:1n-3</b><br/>Molecular formula:<br/>C<sub>11</sub>H<sub>20</sub>O<sub>2</sub></p>                          | 184.15 | 183.14 |
| 4 | <p><b>O-Acetylcypolophine</b><br/>Molecular formula:<br/>C<sub>20</sub>H<sub>28</sub>N<sub>2</sub>O<sub>4</sub></p>  | 360.21 | 359.20 |
| 5 | <p><b>cis-9,10-Epoxystearic acid</b><br/>Molecular formula:<br/>C<sub>18</sub>H<sub>34</sub>O<sub>3</sub></p>      | 298.25 | 297.24 |
| 6 | <p><b>3-O-Mycarosylerythronolide B</b><br/>Molecular formula:<br/>C<sub>28</sub>H<sub>50</sub>O<sub>10</sub></p>   | 546.34 | 545.34 |
| 7 | <p><b>(17Z)-1α,25-dihydroxy-26,27-dimethyl-17,20,22,22,23,23-hexadehydrovitamin D3 / (17Z)-1α,25-dihydroxy-26,27-dimethyl-17,20,22,22,23,23-hexadehydrocholecalciferol</b></p>                        | 438.31 | 473.28 |

|    |                                                                                                                                                                                    |        |        |
|----|------------------------------------------------------------------------------------------------------------------------------------------------------------------------------------|--------|--------|
|    | <p>Molecular formula:<br/><math>C_{29}H_{42}O_3</math></p> 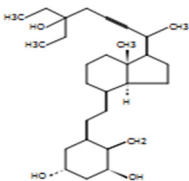                                       |        |        |
| 8  | <p><b>Thiodiglycol</b><br/>Molecular formula:<br/><math>C_4H_{10}O_2S</math></p>                  | 122.04 | 123.05 |
| 9  | <p><b>1-(1-Pyrrolidiny)-2-propanone</b><br/>Molecular formula:<br/><math>C_7H_{13}NO</math></p>  | 127.10 | 128.11 |
| 10 | <p><b>Phenylethylamine</b><br/>Molecular formula:</p>                                           | 121.09 | 122.10 |
| 11 | <p><b>2-Methylpropyl formate</b><br/>Molecular formula:</p>                                     | 102.07 | 103.08 |
| 12 | <p><b>(2R,4R)-2-phenylthiazolidine-4-carboxylic acid</b><br/>Molecular formula:<br/><math>C_{10}H_{11}NO_2S</math></p>                                                             | 209.05 | 210.06 |

|    |                                                                                                                                                                        |        |        |
|----|------------------------------------------------------------------------------------------------------------------------------------------------------------------------|--------|--------|
|    | 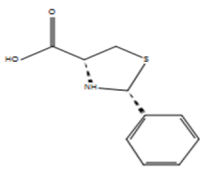                                                                                      |        |        |
| 13 | <b>4-Hydroxypropranolol</b><br>Molecular formula:<br>$C_{16}H_{21}NO_3$               | 275.15 | 276.16 |
| 14 | <b>2-Hydroxyethylclavam</b><br>Molecular formula:<br>$C_7H_{11}NO_3$                 | 157.07 | 158.08 |
| 15 | <b>N-Methylcalystegine B2</b><br>Molecular formula:<br>$C_8H_{15}NO_4$              | 189.10 | 190.11 |
| 16 | <b>9Z,12Z,15E-octadecatrienoic acid</b><br>Molecular formula:<br>$C_{18}H_{30}O_2$  | 278.22 | 279.23 |
| 17 | <b>5-(1-oxopropan-2-yl)isolongifol-5-ene</b><br>Molecular formula: $C_{18}H_{28}O$                                                                                     | 260.21 | 261.22 |

|    |                                                                                                                                                                         |        |        |
|----|-------------------------------------------------------------------------------------------------------------------------------------------------------------------------|--------|--------|
|    | 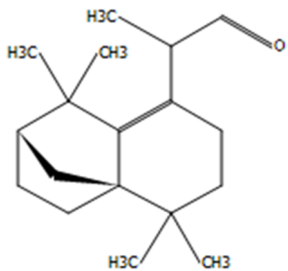                                                                                       |        |        |
| 18 | <b>12-oxo-9E-octadecenoic acid</b><br>Molecular formula:<br>$C_{18}H_{32}O_3$          | 296.24 | 319.22 |
| 19 | <b>11-cis-Dehydroretinal</b><br>Molecular formula: $C_{20}H_{26}O$                    | 282.20 | 300.23 |
| 20 | <b>Acetaldehyde hexyl isoamyl acetal</b><br>Molecular formula:<br>$C_{13}H_{28}O_2$  | 216.21 | 217.22 |
| 21 | <b>Bicyclomahanimbine</b><br>Molecular formula:<br>$C_{23}H_{25}NO$                  | 331.19 | 332.20 |
| 22 | <b>N-(1-Deoxy-1-fructosyl)valine</b><br>Molecular formula:<br>$C_{11}H_{21}NO_7$                                                                                        | 279.13 | 297.16 |

|    |                                                                                                                                                                                   |        |        |
|----|-----------------------------------------------------------------------------------------------------------------------------------------------------------------------------------|--------|--------|
|    | 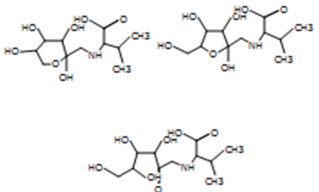                                                                                                 |        |        |
| 23 | <b>9,13-dihydroxy-12-ethoxy-10-octadecenoic acid</b><br>Molecular formula:<br>$C_{20}H_{38}O_5$  | 358.27 | 359.28 |
| 24 | <b>3-hydroxy-decanoic acid</b><br>Molecular formula:<br>$C_{10}H_{20}O_3$                        | 188.14 | 189.15 |
| 25 | <b>Arachidoyl glycine</b><br>Molecular formula:<br>$C_{22}H_{43}NO_3$                          | 369.34 | 370.33 |
| 26 | <b>Notoginsenoside R10</b><br>Molecular formula:<br>$C_{30}H_{50}O_9$                          | 554.34 | 555.35 |

**Table S3B: Molecules that remained unidentified from the conditioned media prepared from *P. aeruginosa* isolated from the small intestine of *C. porosus* through LC-MS.** The conditioned media prepared from *P. aeruginosa* was subjected to chloroform extraction and the extracts were subject to LC-MS analysis. The spectre generated were searched in the METLIN library in order to reveal the potential identity of the detected molecules.

| Compound | Retention time | Molecular mass | Molecular formula    |
|----------|----------------|----------------|----------------------|
| 1        | 0.669          | 147.9732       |                      |
| 2        | 11.9           | 266.0004       | $C_6 H_6 N_2 O_{10}$ |
| 3        | 12.588         | 243.1636       | $C_{16} H_{21} N O$  |

|    |        |           |                 |
|----|--------|-----------|-----------------|
| 4  | 13.765 | 269.1795  | C18 H23 N O     |
| 5  | 15.201 | 476.3002  | C25 H40 N4 O5   |
| 6  | 15.354 | 298.1616  | C16 H26 O3 S    |
| 7  | 15.581 | 549.3533  | C28 H47 N5 O6   |
| 8  | 15.628 | 298.1617  | C16 H26 O3 S    |
| 9  | 16.715 | 312.1776  | C17 H28 O3 S    |
| 10 | 16.797 | 1030.6403 |                 |
| 11 | 16.799 | 504.3318  | C27 H44 N4 O5   |
| 12 | 16.799 | 567.3278  | C27 H45 N5 O8   |
| 13 | 16.803 | 589.309   | C25 H39 N11 O6  |
| 14 | 17.34  | 326.1938  | C14 H30 O8      |
| 15 | 17.748 | 530.3468  | C29 H46 N4 O5   |
| 16 | 17.75  | 593.3429  | C29 H47 N5 O8   |
| 17 | 17.942 | 530.2915  | C32 H34 N8      |
| 18 | 18.478 | 532.3627  | C29 H48 N4 O5   |
| 19 | 18.479 | 595.3578  | C29 H49 N5 O8   |
| 20 | 19.477 | 474.2928  | C20 H34 N12 O2  |
| 21 | 19.807 | 845.9589  |                 |
| 22 | 20.1   | 356.1695  | C16 H28 N4 O S2 |
| 23 | 20.1   | 441.1464  | C21 H23 N5 O4 S |
| 24 | 21.398 | 384.1987  | C21 H28 N4 O S  |
| 25 | 0.55   | 181.9781  | C8 H3 Cl O3     |
| 26 | 0.589  | 157.9571  |                 |
| 27 | 0.872  | 122.0412  | C4 H10 O2 S     |
| 28 | 9.921  | 229.0874  | C11 H16 Cl N O2 |
| 29 | 10.596 | 222.0471  | C10 H10 N2 O2 S |
| 30 | 10.898 | 217.132   | C10 H19 N O4    |
| 31 | 14.23  | 307.1555  | C14 H26 Cl N O4 |
| 32 | 15.198 | 476.2991  | C24 H44 O9      |
| 33 | 15.44  | 220.0904  | C16 H12 O       |
| 34 | 15.577 | 503.3457  | C26 H49 N O8    |
| 35 | 15.72  | 614.4525  | C34 H58 N6 O4   |
| 36 | 15.816 | 378.2983  | C20 H42 O6      |
| 37 | 15.866 | 334.2726  | C18 H38 O5      |
| 38 | 15.88  | 290.2454  | C16 H34 O4      |
| 39 | 16.479 | 104.0834  | C5 H12 O2       |
| 40 | 16.668 | 148.0159  | C8 H4 O3        |
| 41 | 16.686 | 305.1558  | C18 H24 Cl N O  |
| 42 | 16.792 | 1030.6401 |                 |
| 43 | 16.797 | 504.3302  | C26 H48 O9      |
| 44 | 16.831 | 392.3139  | C21 H44 O6      |
| 45 | 16.888 | 348.2888  | C20 H44 S2      |
| 46 | 16.912 | 304.261   | C17 H36 O4      |
| 47 | 17.065 | 313.2047  | C20 H27 N O2    |
| 48 | 17.647 | 314.1675  | C23 H22 O       |
| 49 | 17.747 | 547.3723  | C28 H53 N O9    |
| 50 | 17.938 | 985.5919  |                 |
| 51 | 18.476 | 386.3039  | C22 H42 O5      |

|    |        |          |                  |
|----|--------|----------|------------------|
| 52 | 18.477 | 549.389  | C29 H51 N5 O5    |
| 53 | 19.869 | 473.3059 | C30 H39 N3 O2    |
| 54 | 20.525 | 627.1857 | C35 H37 N3 S4    |
| 55 | 21.34  | 701.2061 | C44 H32 Cl N3 O4 |
| 56 | 23.96  | 662.4483 | C34 H54 N12 O2   |

**Table S4A: Molecules that were identified from the conditioned media prepared from *A. dhakensis* isolated from large intestine of *C. porosus* through LC-MS.** The conditioned media prepared from *A. dhakensis* was subjected to chloroform extraction and the extracts were subject to LC-MS analysis. The spectre generated were searched in the METLIN library in order to reveal the potential identity of the detected molecules.

|   | <b>Compound</b>                                                                                                                                                                                            | <b>Mass</b> | <b><i>m/z</i></b> |
|---|------------------------------------------------------------------------------------------------------------------------------------------------------------------------------------------------------------|-------------|-------------------|
| 1 | <b>N-Acryloylglycine</b><br>Molecular formula:<br>C <sub>5</sub> H <sub>7</sub> NO <sub>3</sub><br>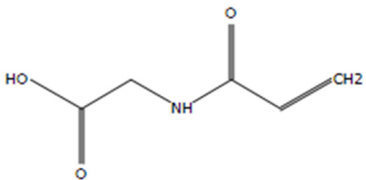                       | 129.04      | 1280.4            |
| 2 | <b>Erythrono-1,4-lactone</b><br>Molecular formula: C <sub>4</sub> H <sub>6</sub> O <sub>4</sub><br>                     | 118.03      | 117.02            |
| 3 | <b>1-(1-Pyrrolidinyl)-2-propanone</b><br>Molecular formula:<br>C <sub>7</sub> H <sub>13</sub> NO<br>                    | 127.10      | 128.11            |
| 4 | <b>5-Methyldeoxycytidine</b><br>Molecular formula:<br>C <sub>10</sub> H <sub>15</sub> N <sub>3</sub> O <sub>4</sub><br> | 241.11      | 242.11            |

|   |                                                                                                                                                                                                          |        |        |
|---|----------------------------------------------------------------------------------------------------------------------------------------------------------------------------------------------------------|--------|--------|
| 5 | <b>His Asn</b><br>Molecular formula:<br>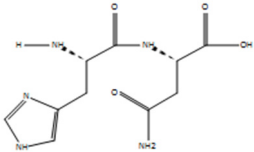                                                                                | 269.11 | 270.12 |
| 6 | <b>2,6-Nonadien-1-ol</b><br>Molecular formula: C <sub>9</sub> H <sub>16</sub> O<br>                                     | 140.12 | 158.15 |
| 7 | <b>2-hydroxy-3-methylhexadecanoic acid</b><br>Molecular formula:<br>C <sub>17</sub> H <sub>34</sub> O <sub>3</sub><br> | 286.25 | 309.24 |

**Table S4B: Molecules that remained unidentified from the conditioned media prepared from *A. dhakensis* isolated from large intestine of *C. porosus* through LC-MS.** The conditioned media prepared from *A. dhakensis* was subjected to chloroform extraction and the extracts were subject to LC-MS analysis. The spectre generated were searched in the METLIN library in order to reveal the potential identity of the detected molecules.

| Compound | Retention time | Molecular mass | Molecular formula                                               |
|----------|----------------|----------------|-----------------------------------------------------------------|
| 1        | 0.692          | 147.9733       |                                                                 |
| 2        | 15.499         | 272.237        | C <sub>16</sub> H <sub>32</sub> O <sub>3</sub>                  |
| 3        | 16.352         | 286.2518       | C <sub>17</sub> H <sub>34</sub> O <sub>3</sub>                  |
| 4        | 17.953         | 530.2909       | C <sub>32</sub> H <sub>34</sub> N <sub>8</sub>                  |
| 5        | 20.104         | 356.1696       | C <sub>16</sub> H <sub>28</sub> N <sub>4</sub> O S <sub>2</sub> |
| 6        | 1.023          | 131.0938       | C <sub>6</sub> H <sub>13</sub> N O <sub>2</sub>                 |
| 7        | 8.93           | 195.0843       | C <sub>5</sub> H <sub>13</sub> N <sub>3</sub> O <sub>5</sub>    |
| 8        | 9.923          | 229.0874       | C <sub>11</sub> H <sub>16</sub> Cl N O <sub>2</sub>             |
| 9        | 16.65          | 296.157        | C <sub>23</sub> H <sub>20</sub>                                 |
| 10       | 17.945         | 985.5919       |                                                                 |
| 11       | 17.948         | 990.5471       |                                                                 |
| 12       | 21.108         | 390.2912       | C <sub>28</sub> H <sub>38</sub> O                               |
| 13       | 21.2           | 370.3143       | C <sub>20</sub> H <sub>42</sub> N <sub>4</sub> S                |
